# Supplementary material for: Evidence for a mental health crisis in graduate education
Source: Springer Nature journal article supplement (doi:10.1038/nbt.4089), 2018-03-01
Supplement: 41587_2018_BFnbt4089_MOESM2_ESM.pdf [file 41587_2018_BFnbt4089_MOESM2_ESM.pdf]

## Supplementary Materials:

**Table S1. Self-Reported Institution**

| <b>Institution</b>                    | <b>N</b> | <b>%</b> |
|---------------------------------------|----------|----------|
| Aberdeen University                   | 1        | 0.0%     |
| Albany Medical College                | 1        | 0.0%     |
| Antioch University Seattle            | 1        | 0.0%     |
| Arizona State University              | 4        | 0.2%     |
| Auburn University                     | 2        | 0.1%     |
| Bastyr University                     | 1        | 0.0%     |
| Baylor College Of Medicine            | 1        | 0.0%     |
| Baylor University                     | 4        | 0.2%     |
| Binghamton University                 | 4        | 0.2%     |
| Boston College                        | 2        | 0.1%     |
| Boston University                     | 5        | 0.2%     |
| Brandeis University                   | 1        | 0.0%     |
| Brock University                      | 1        | 0.0%     |
| Brown University                      | 3        | 0.1%     |
| California Institute Of Technology    | 1        | 0.0%     |
| California Southern University        | 1        | 0.0%     |
| Cameron University                    | 3        | 0.1%     |
| Carleton University                   | 2        | 0.1%     |
| Carnegie Mellon University            | 7        | 0.3%     |
| Case Western Reserve University       | 4        | 0.2%     |
| Chalmers University Of Technology     | 1        | 0.0%     |
| Chapman University                    | 1        | 0.0%     |
| City Of Hope                          | 1        | 0.0%     |
| City University Of New York           | 2        | 0.1%     |
| Clemson University                    | 1        | 0.0%     |
| Cleveland State University            | 1        | 0.0%     |
| College Of Saint Elizabeth            | 1        | 0.0%     |
| Colorado State University             | 2        | 0.1%     |
| Columbia University                   | 27       | 1.2%     |
| Complutense University Of Madrid      | 1        | 0.0%     |
| Cornell University                    | 77       | 3.4%     |
| Creighton University                  | 1        | 0.0%     |
| Dalhousie University                  | 2        | 0.1%     |
| Dartmouth University                  | 2        | 0.1%     |
| Depaul University                     | 1        | 0.0%     |
| Dresden University of Technology      | 2        | 0.1%     |
| Drexel University College Of Medicine | 2        | 0.1%     |
| Duke University                       | 91       | 4.0%     |
| East Carolina University              | 1        | 0.0%     |
| Ecole Normale Supérieure              | 1        | 0.0%     |
| Edinburgh University                  | 1        | 0.0%     |
| Emmanuel College                      | 1        | 0.0%     |
| Emory University                      | 1        | 0.0%     |
| Erasmus University Rotterdam          | 2        | 0.1%     |
| European Molecular Biology Laboratory | 3        | 0.1%     |
| Fielding Graduate University          | 1        | 0.0%     |

|                                                  |    |      |
|--------------------------------------------------|----|------|
| Florida International University                 | 2  | 0.1% |
| Florida State University                         | 13 | 0.6% |
| George Mason University                          | 1  | 0.0% |
| Georgetown University                            | 4  | 0.2% |
| Georgia Institute Of Technology                  | 6  | 0.3% |
| Georgia State University                         | 8  | 0.4% |
| Glasgow Caledonian University                    | 1  | 0.0% |
| Groningen University                             | 1  | 0.0% |
| Harvard University                               | 14 | 0.6% |
| Heriot Watt University                           | 1  | 0.0% |
| Icahn School Of Medicine At Mount Sinai          | 1  | 0.0% |
| Illinois Institute Of Technology                 | 1  | 0.0% |
| Indiana State University                         | 1  | 0.0% |
| Indiana University                               | 7  | 0.3% |
| Iowa State University                            | 1  | 0.0% |
| Johns Hopkins University                         | 47 | 2.1% |
| Kent State University                            | 1  | 0.0% |
| King's College London                            | 1  | 0.0% |
| Lancaster University                             | 1  | 0.0% |
| Lehigh University                                | 7  | 0.3% |
| London School Of Economics And Political Science | 1  | 0.0% |
| Louisiana State University                       | 1  | 0.0% |
| Lund University                                  | 1  | 0.0% |
| Marquette University                             | 1  | 0.0% |
| Marymount University                             | 1  | 0.0% |
| Massachusetts Institute Of Technology            | 5  | 0.2% |
| Mcgill University                                | 1  | 0.0% |
| Mcmaster University                              | 2  | 0.1% |
| Medical University Of South Carolina             | 46 | 2.0% |
| Memorial University Newfoundland                 | 1  | 0.0% |
| Michigan State University                        | 96 | 4.2% |
| Michigan Technological University                | 1  | 0.0% |
| Missouri University Of Science And Technology    | 1  | 0.0% |
| Naropa University                                | 2  | 0.1% |
| New Jersey Institute Of Technology               | 1  | 0.0% |
| New Mexico State University                      | 1  | 0.0% |
| New York University                              | 6  | 0.3% |
| North Carolina State University                  | 1  | 0.0% |
| North Dakota State University                    | 2  | 0.1% |
| Northeastern University                          | 14 | 0.6% |
| Northwestern University                          | 10 | 0.4% |
| Nottingham University                            | 1  | 0.0% |
| Nova Southeastern University                     | 1  | 0.0% |
| Ohio State University                            | 13 | 0.6% |
| Oklahoma State University                        | 1  | 0.0% |
| Old Dominion University                          | 1  | 0.0% |
| Oregon State University                          | 7  | 0.3% |
| Pennsylvania State University                    | 4  | 0.2% |
| Ponce Health Sciences University                 | 1  | 0.0% |

|                                                    |     |      |
|----------------------------------------------------|-----|------|
| Portland State University                          | 3   | 0.1% |
| Princeton University                               | 4   | 0.2% |
| Purdue University                                  | 1   | 0.0% |
| Radboud University                                 | 1   | 0.0% |
| Regent University                                  | 1   | 0.0% |
| Rice University                                    | 5   | 0.2% |
| Rosalind Franklin University Of Medicine And Scien | 2   | 0.1% |
| Ruhr University Bochum                             | 1   | 0.0% |
| Rutgers University                                 | 1   | 0.0% |
| Saint Louis University                             | 1   | 0.0% |
| San Diego State University                         | 12  | 0.5% |
| San Francisco State University                     | 1   | 0.0% |
| Sapienza Univetsity Of Rome                        | 1   | 0.0% |
| Saybrook University                                | 1   | 0.0% |
| Scuola Normale Superiore                           | 1   | 0.0% |
| Simmons College                                    | 1   | 0.0% |
| Southern Methodist University                      | 1   | 0.0% |
| Stanford University                                | 6   | 0.3% |
| State University of New York                       | 7   | 0.3% |
| Stony Brook University                             | 4   | 0.2% |
| Suffolk University                                 | 3   | 0.1% |
| Swiss Federal Institute of Technology              | 2   | 0.1% |
| Syracuse University                                | 2   | 0.1% |
| Technology University of Wien                      | 1   | 0.0% |
| Temple University                                  | 2   | 0.1% |
| Texas A&M University                               | 12  | 0.5% |
| The Chicago School Of Professional Psychology      | 1   | 0.0% |
| The Hubrecht Institute                             | 1   | 0.0% |
| The New School                                     | 1   | 0.0% |
| The Sage Colleges                                  | 2   | 0.1% |
| Tilburg University                                 | 1   | 0.0% |
| Trinity College Dublin                             | 3   | 0.1% |
| Tulane University                                  | 3   | 0.1% |
| Uniformed Services University                      | 1   | 0.0% |
| University College Of London                       | 1   | 0.0% |
| University Kiel                                    | 1   | 0.0% |
| University Medical Center Groningen                | 1   | 0.0% |
| University Of Akron                                | 2   | 0.1% |
| University Of Alabama                              | 6   | 0.3% |
| University Of Alaska                               | 2   | 0.1% |
| University Of Algarve                              | 1   | 0.0% |
| University Of Arizona                              | 6   | 0.3% |
| University Of Arkansas Medical Center              | 2   | 0.1% |
| University Of Basel                                | 1   | 0.0% |
| University Of Birmingham                           | 1   | 0.0% |
| University Of Bordeaux                             | 1   | 0.0% |
| University Of British Columbia                     | 3   | 0.1% |
| University Of Calgary                              | 3   | 0.1% |
| University Of California                           | 186 | 8.2% |

|                                 |     |      |
|---------------------------------|-----|------|
| University Of Cambridge         | 4   | 0.2% |
| University Of Chicago           | 108 | 4.7% |
| University Of Cincinnati        | 1   | 0.0% |
| University Of Colorado          | 3   | 0.1% |
| University Of Connecticut       | 2   | 0.1% |
| University Of Copenhagen        | 1   | 0.0% |
| University Of Delaware          | 1   | 0.0% |
| University Of Edinburgh         | 3   | 0.1% |
| University Of Florida           | 88  | 3.9% |
| University Of Freiburg          | 1   | 0.0% |
| University Of Georgia           | 14  | 0.6% |
| University Of Grenoble          | 1   | 0.0% |
| University Of Guelph            | 2   | 0.1% |
| University Of Houston           | 1   | 0.0% |
| University Of Idaho             | 3   | 0.1% |
| University Of Illinois          | 29  | 1.3% |
| University Of Indianapolis      | 1   | 0.0% |
| University Of Iowa              | 5   | 0.2% |
| University Of Kansas            | 3   | 0.1% |
| University Of Kentucky          | 69  | 3.0% |
| University Of Kiel              | 1   | 0.0% |
| University Of Leeds             | 3   | 0.1% |
| University Of Leicester         | 1   | 0.0% |
| University Of Lisbon            | 1   | 0.0% |
| University Of Louisville        | 1   | 0.0% |
| University Of Maine             | 1   | 0.0% |
| University Of Manitoba          | 1   | 0.0% |
| University Of Maryland          | 14  | 0.6% |
| University Of Massachusetts     | 6   | 0.3% |
| University Of Memphis           | 2   | 0.1% |
| University Of Miami             | 12  | 0.5% |
| University Of Michigan          | 13  | 0.6% |
| University Of Minho             | 1   | 0.0% |
| University Of Minnesota         | 46  | 2.0% |
| University Of Mississippi       | 2   | 0.1% |
| University Of Missouri          | 4   | 0.2% |
| University Of Montana           | 5   | 0.2% |
| University Of Montreal          | 2   | 0.1% |
| University Of Nebraska          | 4   | 0.2% |
| University Of Nevada            | 2   | 0.1% |
| University Of New Brunswick     | 1   | 0.0% |
| University Of New Mexico        | 1   | 0.0% |
| University Of New Orleans       | 1   | 0.0% |
| University Of North Carolina    | 160 | 7.0% |
| University Of Northern Colorado | 1   | 0.0% |
| University Of Notre Dame        | 3   | 0.1% |
| University Of Oklahoma          | 2   | 0.1% |
| University Of Oregon            | 14  | 0.6% |
| University Of Ottawa            | 1   | 0.0% |

|                                    |     |       |
|------------------------------------|-----|-------|
| University Of Oxford               | 4   | 0.2%  |
| University Of Paris                | 1   | 0.0%  |
| University Of Pennsylvania         | 8   | 0.4%  |
| University Of Pittsburgh           | 14  | 0.6%  |
| University Of Prince Edward Island | 1   | 0.0%  |
| University Of Puerto Rico          | 2   | 0.1%  |
| University Of Rochester            | 9   | 0.4%  |
| University Of Saskatchewan         | 1   | 0.0%  |
| University Of Sherbrooke           | 1   | 0.0%  |
| University Of South Carolina       | 1   | 0.0%  |
| University Of South Dakota         | 1   | 0.0%  |
| University Of South Florida        | 1   | 0.0%  |
| University Of Southern California  | 2   | 0.1%  |
| University Of Southern Denmark     | 1   | 0.0%  |
| University Of São Paulo            | 1   | 0.0%  |
| University Of Texas                | 33  | 1.4%  |
| University Of Toronto              | 3   | 0.1%  |
| University Of Utah                 | 3   | 0.1%  |
| University Of Vermont              | 2   | 0.1%  |
| University Of Victoria             | 1   | 0.0%  |
| University Of Virginia             | 3   | 0.1%  |
| University Of Washington           | 58  | 2.5%  |
| University Of Waterloo             | 1   | 0.0%  |
| University Of Western Ontario      | 1   | 0.0%  |
| University Of Wisconsin            | 170 | 7.5%  |
| University Of Wyoming              | 1   | 0.0%  |
| University of Strasbourg           | 1   | 0.0%  |
| Utah State University              | 1   | 0.0%  |
| Van Andel Institute                | 1   | 0.0%  |
| Vanderbilt University              | 12  | 0.5%  |
| Vienna University Of Technology    | 1   | 0.0%  |
| Virginia Commonwealth University   | 2   | 0.1%  |
| Vrije Universiteit Amsterdam       | 1   | 0.0%  |
| Walden University                  | 1   | 0.0%  |
| Washington University              | 7   | 0.3%  |
| Wayne State University             | 3   | 0.1%  |
| West Virginia University           | 2   | 0.1%  |
| Western Michigan University        | 2   | 0.1%  |
| William James College              | 1   | 0.0%  |
| Xavier University                  | 1   | 0.0%  |
| Yale University                    | 6   | 0.3%  |
| Missing Institutions               | 342 | 15.0% |

**Table S2. Self-Reported Country**

| <b>Country</b>  | <b>N</b> | <b>%</b> |
|-----------------|----------|----------|
| Argentina       | 1        | 0.0%     |
| Brazil          | 1        | 0.0%     |
| Canada          | 40       | 1.8%     |
| Chile           | 1        | 0.0%     |
| China           | 3        | 0.1%     |
| Costa Rica      | 1        | 0.0%     |
| Denmark         | 2        | 0.1%     |
| Finland         | 1        | 0.0%     |
| France          | 7        | 0.3%     |
| Germany         | 20       | 0.9%     |
| India           | 4        | 0.2%     |
| Ireland         | 4        | 0.2%     |
| Italy           | 3        | 0.1%     |
| Japan           | 1        | 0.0%     |
| Philippines     | 1        | 0.0%     |
| Portugal        | 2        | 0.1%     |
| Puerto Rico     | 3        | 0.1%     |
| Scotland        | 2        | 0.1%     |
| Spain           | 1        | 0.0%     |
| Sweden          | 4        | 0.2%     |
| Switzerland     | 4        | 0.2%     |
| Taiwan          | 1        | 0.0%     |
| Thailand        | 1        | 0.0%     |
| The Netherlands | 9        | 0.4%     |
| USA             | 2087     | 91.5%    |
| United Kingdom  | 39       | 1.7%     |
| Missing Country | 37       | 1.6%     |
